# Supplementary material for: The influence of ammonia emission inventories on size-resolved global atmospheric aerosol composition and acidity
Source: Copernicus journal article supplement (doi:10.5194/acp-25-10559-2025), 2025-09-16
Supplement: Supplementary file 1 [file acp-25-10559-2025-supplement.pdf]

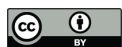

*Supplement of*

## **The influence of ammonia emission inventories on size-resolved global atmospheric aerosol composition and acidity**

**Xurong Wang et al.**

*Correspondence to:* Alexandra P. Tsimpidi ([a.tsimpidi@fz-juelich.de](mailto:a.tsimpidi@fz-juelich.de)) and Vlassis A. Karydis ([v.karydis@fz-juelich.de](mailto:v.karydis@fz-juelich.de))

The copyright of individual parts of the supplement might differ from the article licence.

**Table S1.** Regional NO<sub>x</sub> and SO<sub>2</sub> emission amount (Tg yr<sup>-1</sup>) comparison between CAMS and CEDS\_GBD.

|               | NO <sub>x</sub> |          |                     | SO <sub>2</sub> |          |                     |
|---------------|-----------------|----------|---------------------|-----------------|----------|---------------------|
|               | CAMS            | CEDS_GBD | Relative difference | CAMS_GBD        | CEDS_GBD | Relative difference |
| Land          | 75.9            | 86.2     | 14%                 | 101.3           | 104.4    | 3.1%                |
| North America | 8.6             | 9.2      | 6.5%                | 9.6             | 6.9      | -28%                |
| South America | 5.4             | 5.6      | 2.3%                | 4.8             | 5.8      | 21%                 |
| Europe        | 6.2             | 7.0      | 14%                 | 7.9             | 8.1      | 2.2%                |
| Middle East   | 3.3             | 3.4      | 3.2%                | 5.2             | 6.0      | 15%                 |
| South Asia    | 6.3             | 7.0      | 12%                 | 9.9             | 9.6      | -3.3%               |
| East Asia     | 17.2            | 19.0     | 11%                 | 28.0            | 29.1     | 4.0%                |

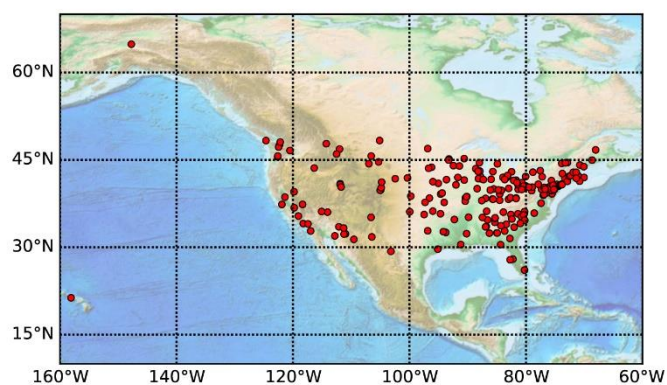

**Figure S1.** The location of EPA sites represented by red circles.

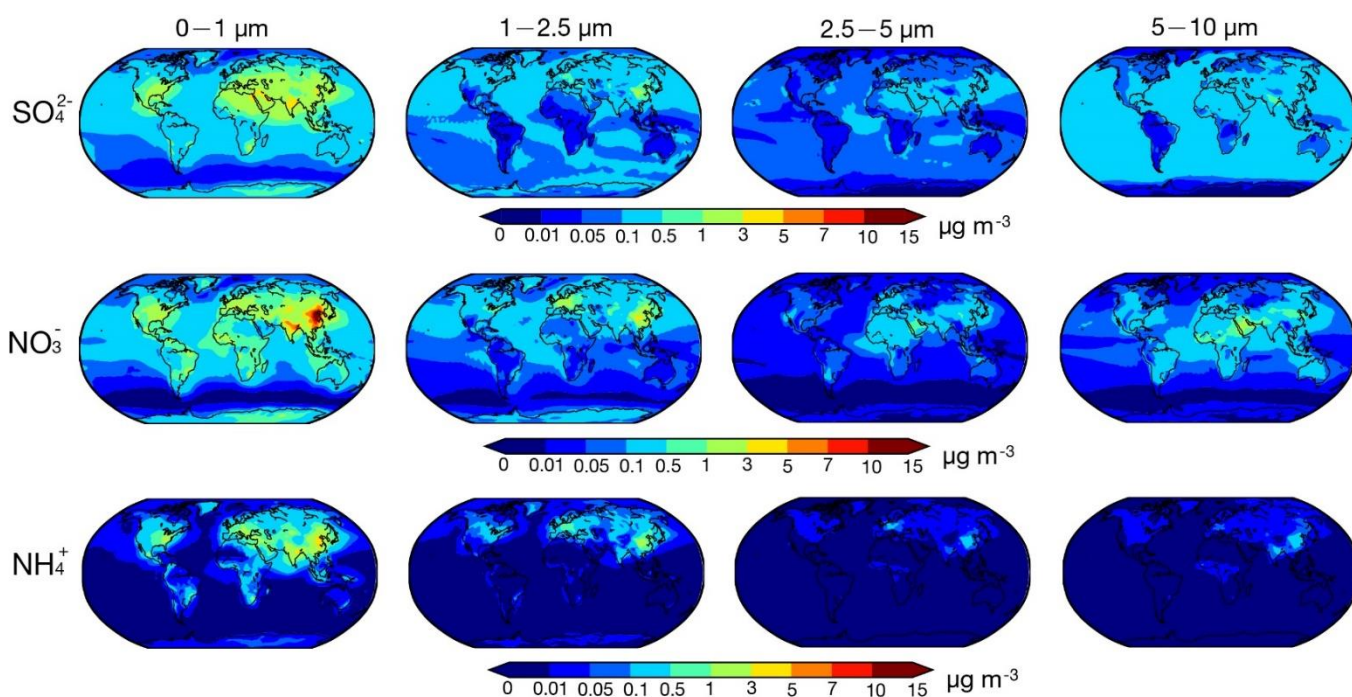

**Figure S2.** Global distribution maps of SO<sub>4</sub><sup>2-</sup>, NO<sub>3</sub><sup>-</sup>, and NH<sub>4</sub><sup>+</sup> mass concentrations in the size ranges of 0 – 1 μm, 1 – 2.5 μm, 2.5 – 5 μm, and 5 – 10 μm derived from base case simulation, averaged from 2010 to 2012.

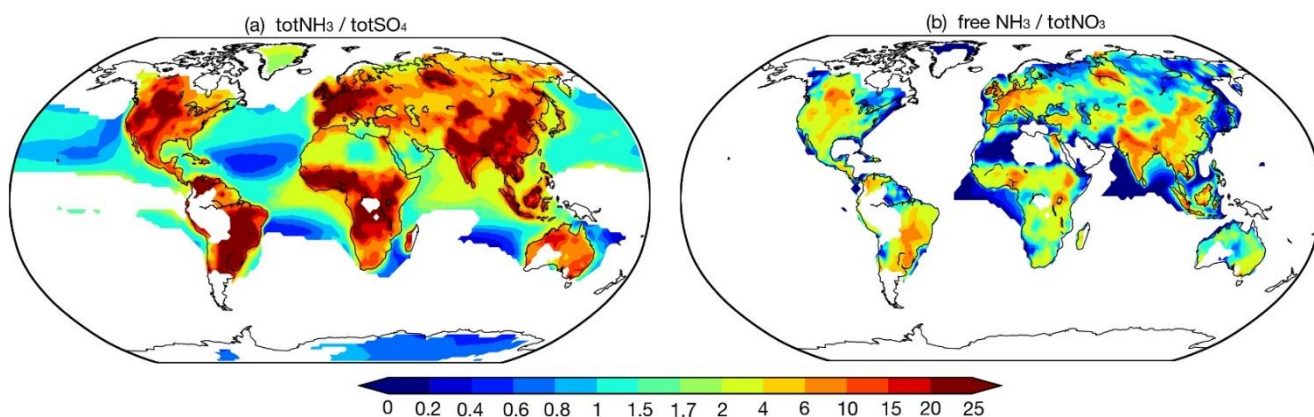

**Figure S3.** (a) Global distribution molar ratio of totNH<sub>3</sub> (sum of NH<sub>4</sub><sup>+</sup> and NH<sub>3</sub>) to totSO<sub>4</sub> (sum of SO<sub>4</sub><sup>2-</sup> and HSO<sub>4</sub><sup>-</sup>). (b) global distribution molar ratio of free NH<sub>3</sub> (totNH<sub>3</sub> minus double totSO<sub>4</sub>) to totNO<sub>3</sub> (sum of NO<sub>3</sub><sup>-</sup> and HNO<sub>3</sub>), both (a) and (b) are based on SNA molar concentrations in PM<sub>10</sub> with a threshold of  $\geq 1 \mu\text{g m}^{-3}$ .

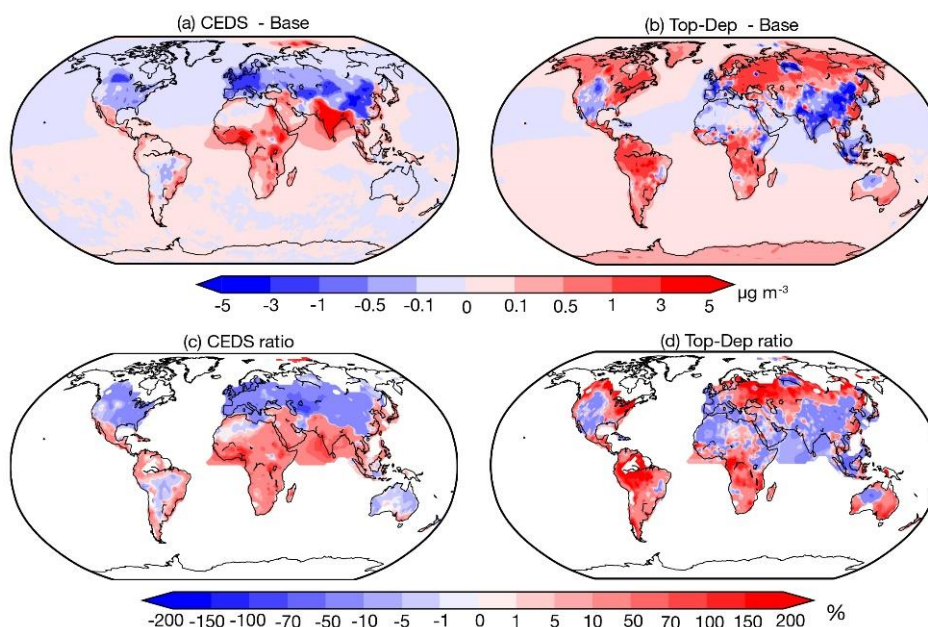

**Figure S4.** Global distribution maps of surface NH<sub>3</sub> mass concentration absolute difference between CEDS case (a) and Top-Dep case (b) and base case; change ratio (absolute difference/Base case) between CEDS case (c) and Top-Dep case (d) and base case, averaged from 2010 to 2012. The calculation of change ratio is based on the mask of  $0.3 \mu\text{g m}^{-3}$ .



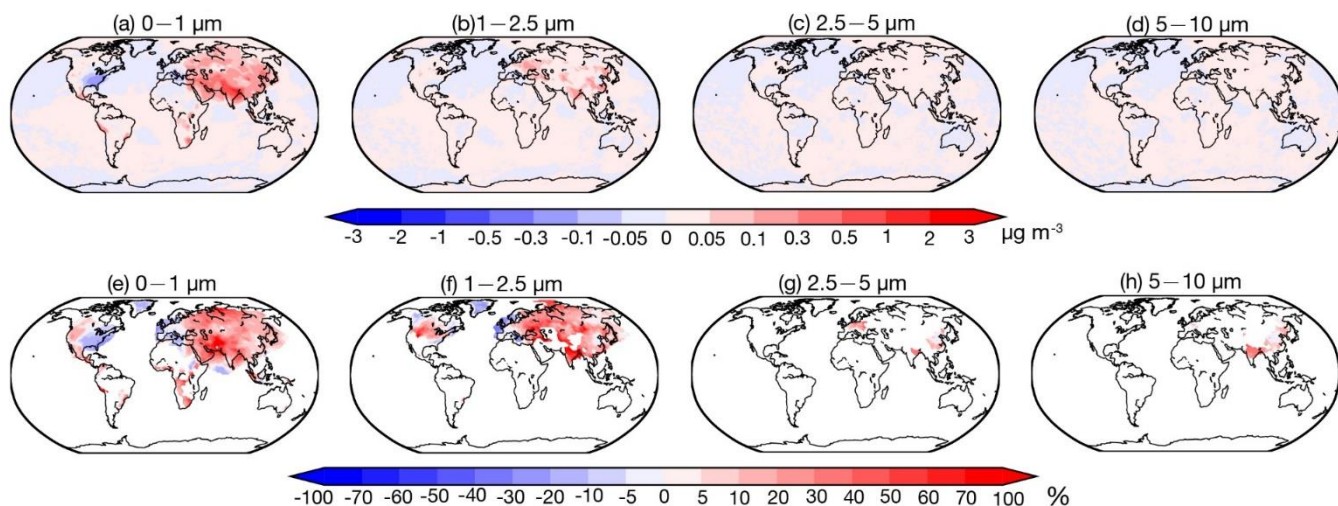

**Figure S5.** Global distribution maps of surface  $\text{NH}_4^+$  mass concentration absolute difference between CEDS case and base case in 0 – 1  $\mu\text{m}$  (a), 1 – 2.5  $\mu\text{m}$  (b), 2.5 – 5  $\mu\text{m}$  (c), 5 – 10  $\mu\text{m}$  (d); change ratio (absolute difference/base case) between CEDS case and base case in 0 – 1  $\mu\text{m}$  (e), 1 – 2.5  $\mu\text{m}$  (f), 2.5 – 5  $\mu\text{m}$  (g), 5 – 10  $\mu\text{m}$  (h), averaged from 2010 to 2012. The calculation of change ratio in full size and 0 – 1  $\mu\text{m}$  is based on the mask of  $0.1 \mu\text{g m}^{-3}$ , in 1 – 2.5  $\mu\text{m}$ , 2.5 – 5  $\mu\text{m}$  and 5 – 10  $\mu\text{m}$  is based on the mask of  $0.05 \mu\text{g m}^{-3}$ .

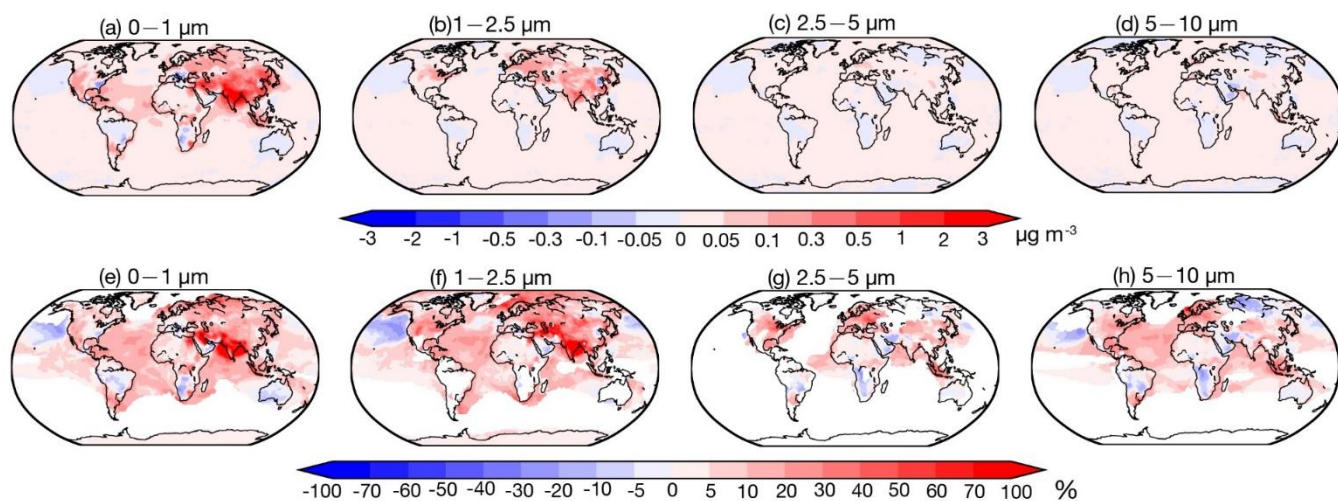

**Figure S6.** Global distribution maps of surface  $\text{NO}_3^-$  mass concentration absolute difference between CEDS case and base case in 0 – 1  $\mu\text{m}$  (a), 1 – 2.5  $\mu\text{m}$  (b), 2.5 – 5  $\mu\text{m}$  (c), 5 – 10  $\mu\text{m}$  (d); change ratio (absolute difference/base case) between CEDS case and base case in 0 – 1  $\mu\text{m}$  (e), 1 – 2.5  $\mu\text{m}$  (f), 2.5 – 5  $\mu\text{m}$  (g), 5 – 10  $\mu\text{m}$  (h), averaged from 2010 to 2012. The calculation of change ratio in full size and 0 – 1  $\mu\text{m}$  is based on the mask of  $0.1 \mu\text{g m}^{-3}$ , in 1 – 2.5  $\mu\text{m}$ , 2.5 – 5  $\mu\text{m}$  and 5 – 10  $\mu\text{m}$  is based on the mask of  $0.05 \mu\text{g m}^{-3}$ .

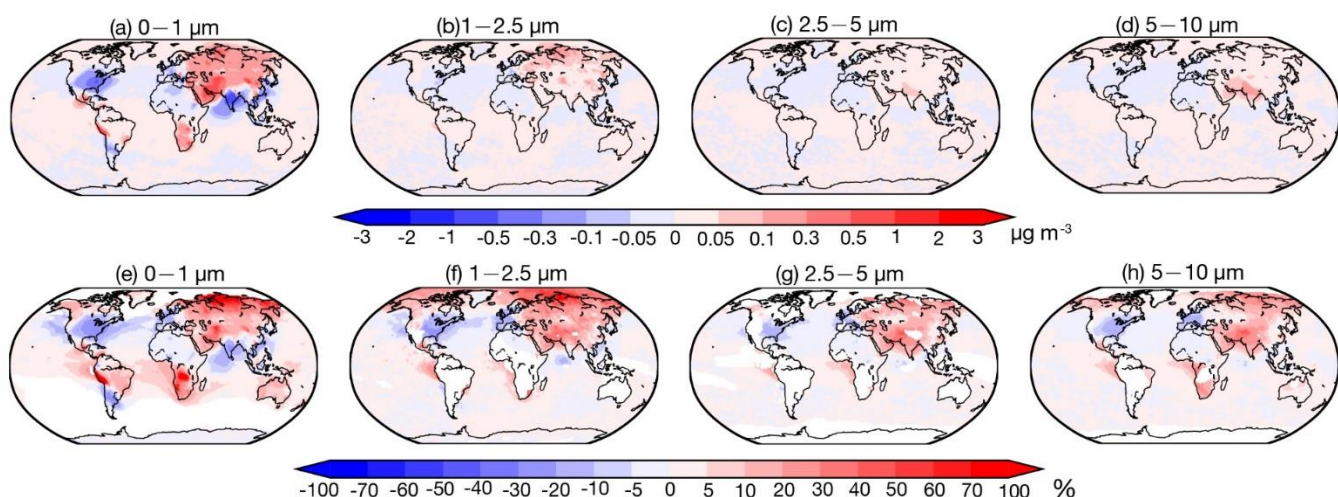

**Figure S7.** Global distribution maps of surface  $\text{SO}_4^{2-}$  mass concentration absolute difference between CEDS case and base case in 0 – 1  $\mu\text{m}$  (a), 1 – 2.5  $\mu\text{m}$  (b), 2.5 – 5  $\mu\text{m}$  (c), 5 – 10  $\mu\text{m}$  (d); change ratio (absolute difference/base case) between CEDS case and base case in 0 – 1  $\mu\text{m}$  (e), 1 – 2.5  $\mu\text{m}$  (f), 2.5 – 5  $\mu\text{m}$  (g), 5 – 10  $\mu\text{m}$  (h), averaged from 2010 to 2012. The calculation of change ratio in full size and 0 – 1  $\mu\text{m}$  is based on the mask of  $0.1 \mu\text{g m}^{-3}$ , in 1 – 2.5  $\mu\text{m}$ , 2.5 – 5  $\mu\text{m}$  and 5 – 10  $\mu\text{m}$  is based on the mask of  $0.05 \mu\text{g m}^{-3}$ .

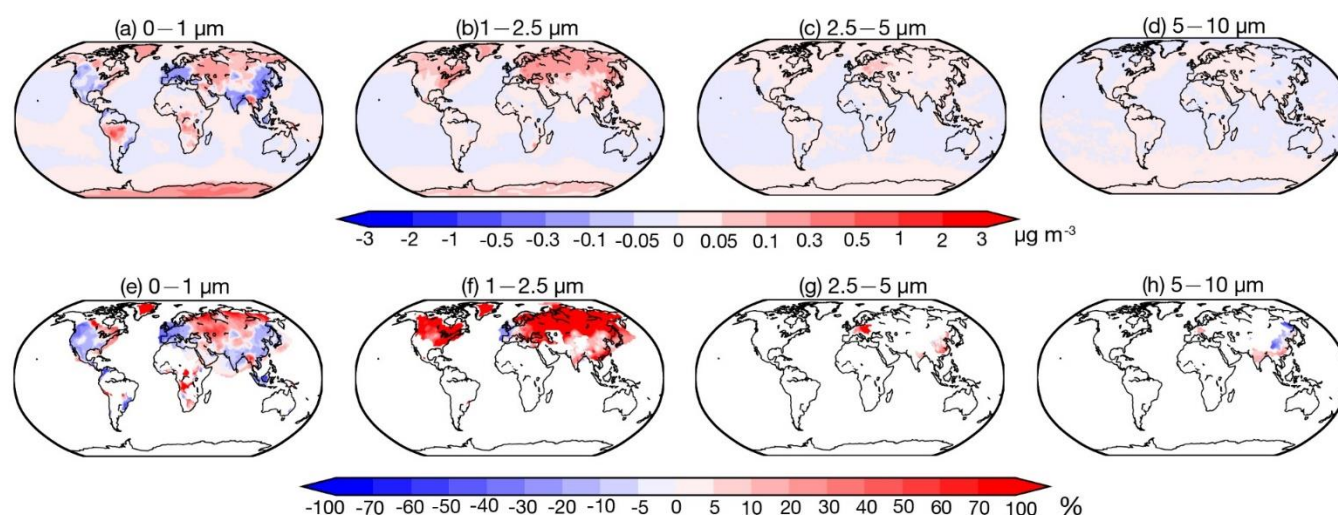

**Figure S8.** Global distribution maps of surface  $\text{NH}_4^+$  mass concentration absolute difference between Top-Dep case and base case in 0 – 1  $\mu\text{m}$  (a), 1 – 2.5  $\mu\text{m}$  (b), 2.5 – 5  $\mu\text{m}$  (c), 5 – 10  $\mu\text{m}$  (d); change ratio (absolute difference/base case) between CEDS case and base case in 0 – 1  $\mu\text{m}$  (e), 1 – 2.5  $\mu\text{m}$  (f), 2.5 – 5  $\mu\text{m}$  (g), 5 – 10  $\mu\text{m}$  (h), averaged from 2010 to 2012. The calculation of change ratio in full size and 0 – 1  $\mu\text{m}$  is based on the mask of  $0.1 \mu\text{g m}^{-3}$ , in 1 – 2.5  $\mu\text{m}$ , 2.5 – 5  $\mu\text{m}$  and 5 – 10  $\mu\text{m}$  is based on the mask of  $0.05 \mu\text{g m}^{-3}$ .



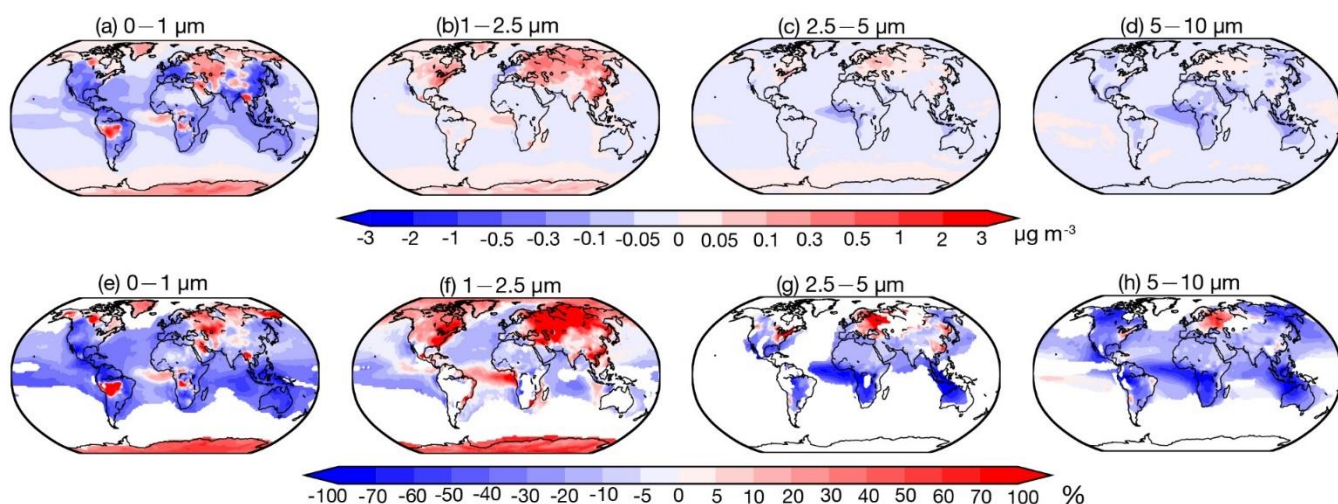

**Figure S9.** Global distribution maps of surface  $\text{NO}_3^-$  mass concentration absolute difference between Top-Dep case and base case in 0 – 1  $\mu\text{m}$  (a), 1 – 2.5  $\mu\text{m}$  (b), 2.5 – 5  $\mu\text{m}$  (c), 5 – 10  $\mu\text{m}$  (d); change ratio (absolute difference/base case) between CEDS case and base case in 0 – 1  $\mu\text{m}$  (e), 1 – 2.5  $\mu\text{m}$  (f), 2.5 – 5  $\mu\text{m}$  (g), 5 – 10  $\mu\text{m}$  (h), averaged from 2010 to 2012. The calculation of change ratio in full size and 0 – 1  $\mu\text{m}$  is based on the mask of 0.1  $\mu\text{g m}^{-3}$ , in 1 – 2.5  $\mu\text{m}$ , 2.5 – 5  $\mu\text{m}$  and 5 – 10  $\mu\text{m}$  is based on the mask of 0.05  $\mu\text{g m}^{-3}$ .

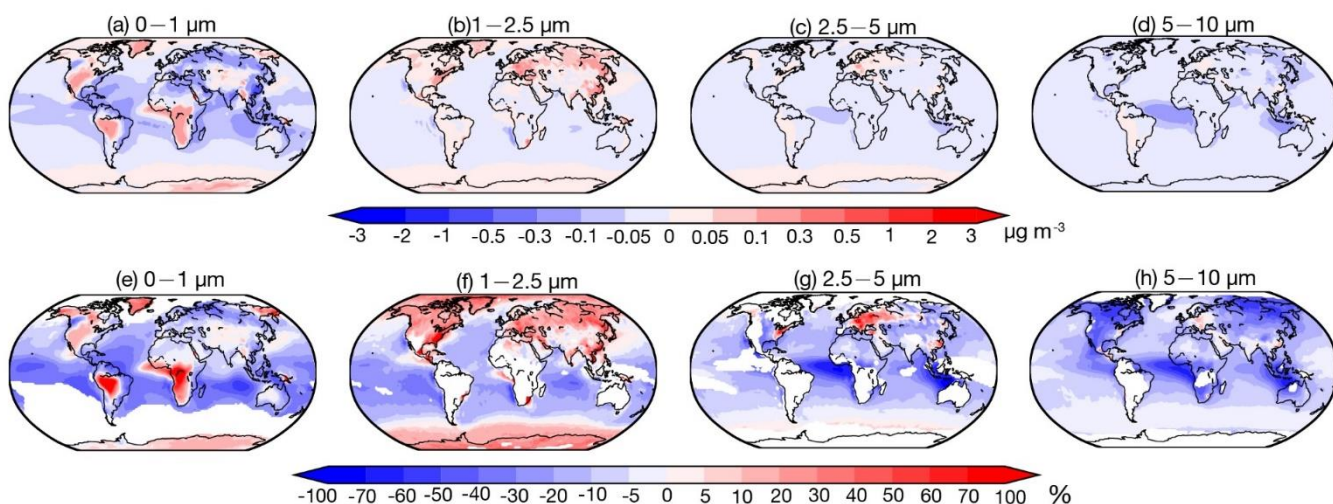

**Figure S10.** Global distribution maps of surface  $\text{SO}_4^{2-}$  mass concentration absolute difference between Top-Dep case and base case in 0 – 1  $\mu\text{m}$  (a), 1 – 2.5  $\mu\text{m}$  (b), 2.5 – 5  $\mu\text{m}$  (c), 5 – 10  $\mu\text{m}$  (d); change ratio (absolute difference/base case) between CEDS case and base case in 0 – 1  $\mu\text{m}$  (e), 1 – 2.5  $\mu\text{m}$  (f), 2.5 – 5  $\mu\text{m}$  (g), 5 – 10  $\mu\text{m}$  (h), averaged from 2010 to 2012. The calculation of change ratio in full size and 0 – 1  $\mu\text{m}$  is based on the mask of 0.1  $\mu\text{g m}^{-3}$ , in 1 – 2.5  $\mu\text{m}$ , 2.5 – 5  $\mu\text{m}$  and 5 – 10  $\mu\text{m}$  is based on the mask of 0.05  $\mu\text{g m}^{-3}$ .

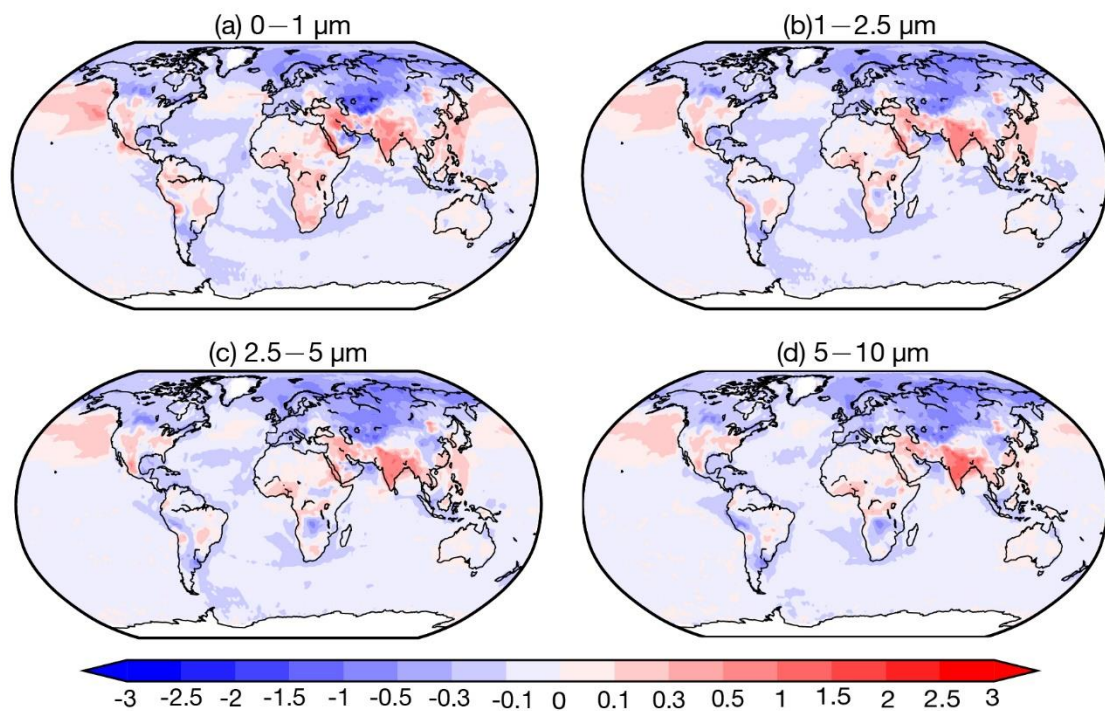

**Figure S11.** Global distribution maps of pH value absolute difference between CEDS case and base case in the size ranges of 0 – 1  $\mu\text{m}$ , 1 – 2.5  $\mu\text{m}$ , 2.5 – 5  $\mu\text{m}$ , and 5 – 10  $\mu\text{m}$ , averaged from 2010 to 2012.

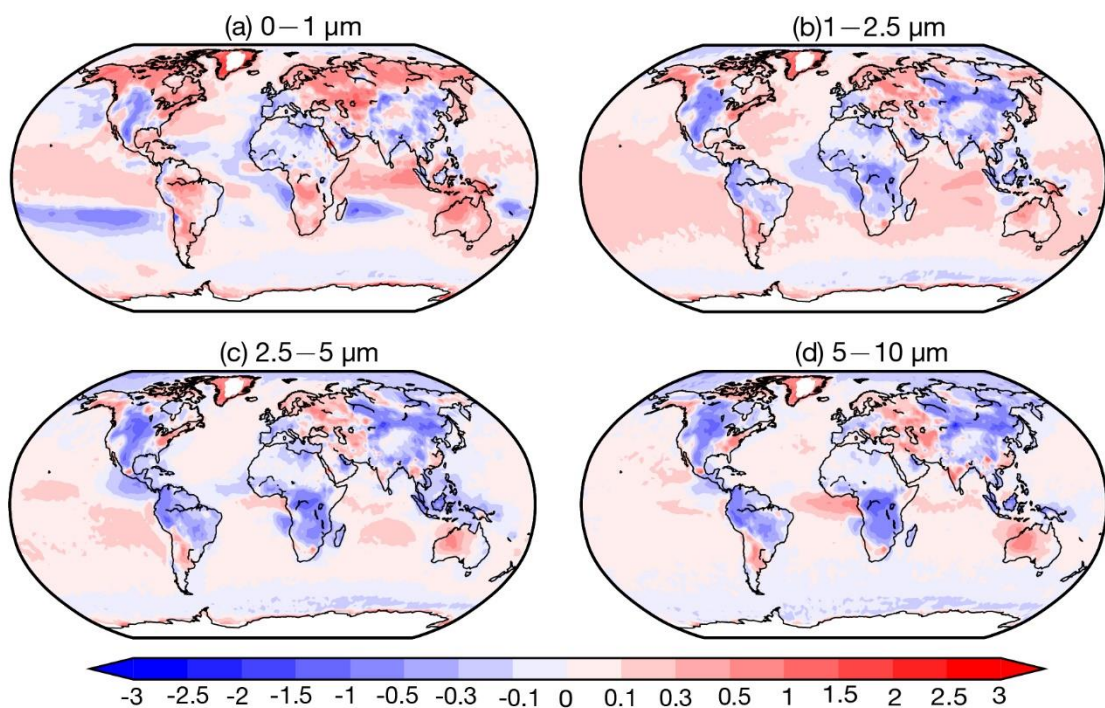

**Figure S12.** Global distribution maps of pH value absolute difference between Top-Dep case and base case in the size ranges of 0 – 1  $\mu\text{m}$ , 1 – 2.5  $\mu\text{m}$ , 2.5 – 5  $\mu\text{m}$ , and 5 – 10  $\mu\text{m}$ , averaged from 2010 to 2012.



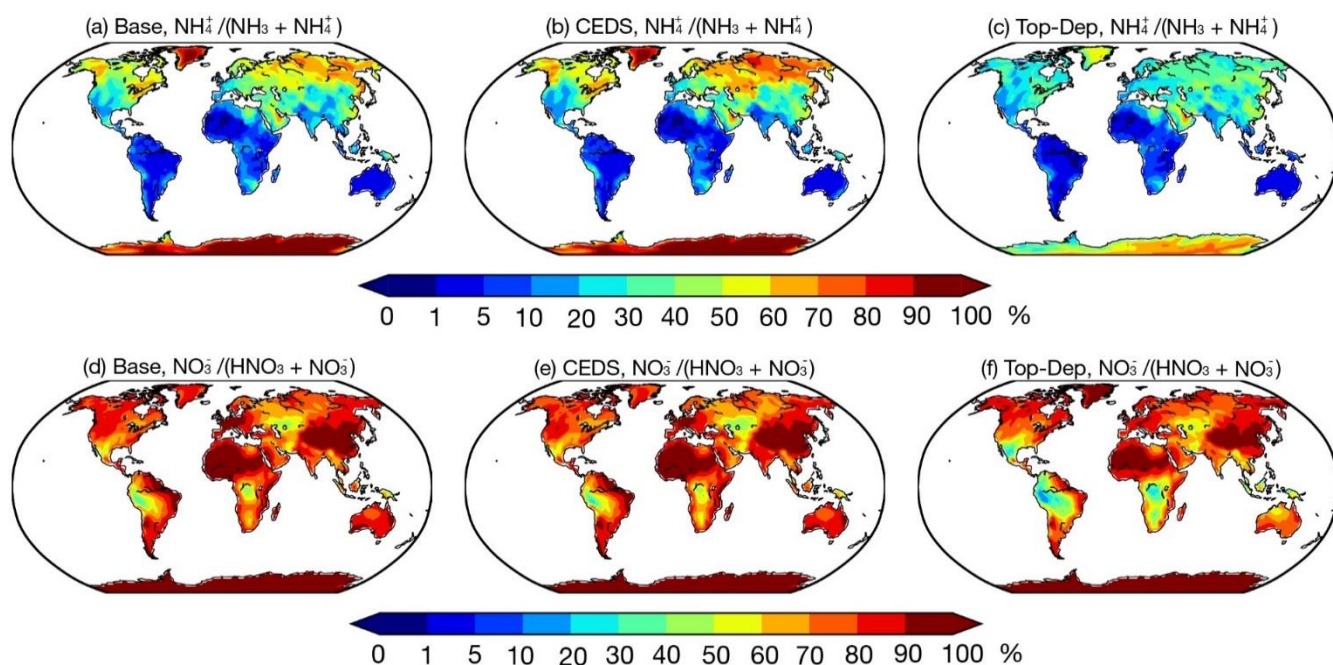

**Figure S13.** Global distribution maps of gas-particle partitioning molar ratio of  $\text{NH}_3/\text{NH}_4^+$  and  $\text{NO}_3^-/\text{HNO}_3$  from simulation results, averaged from 2010 to 2012.

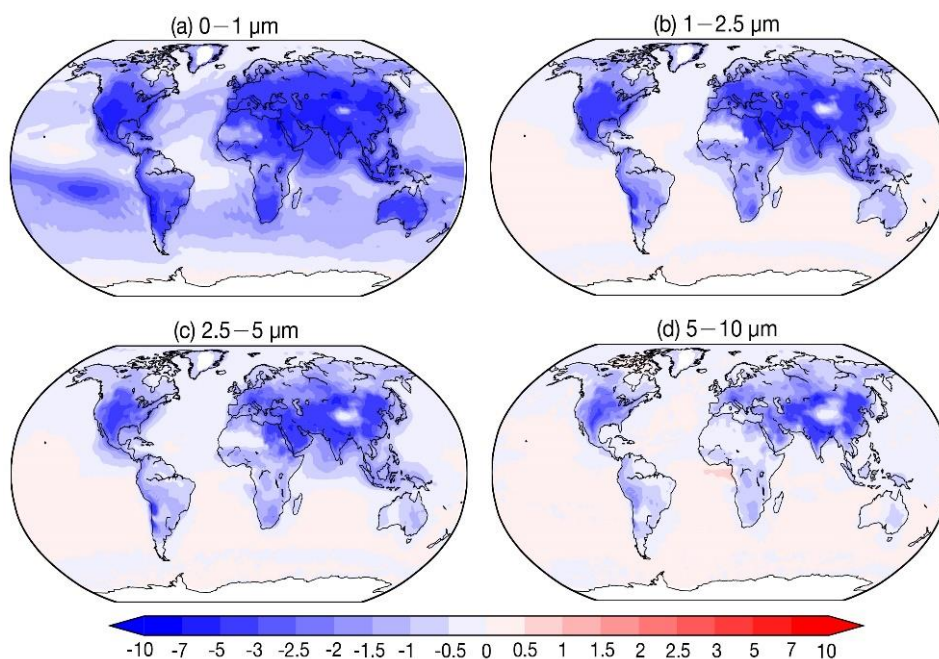

**Figure S14.** Global distribution maps of pH value absolute difference between no $\text{NH}_3$  case and base case in the size ranges of 0–1  $\mu\text{m}$ , 1–2.5  $\mu\text{m}$ , 2.5–5  $\mu\text{m}$ , and 5–10  $\mu\text{m}$ , averaged from 2010 to 2012.



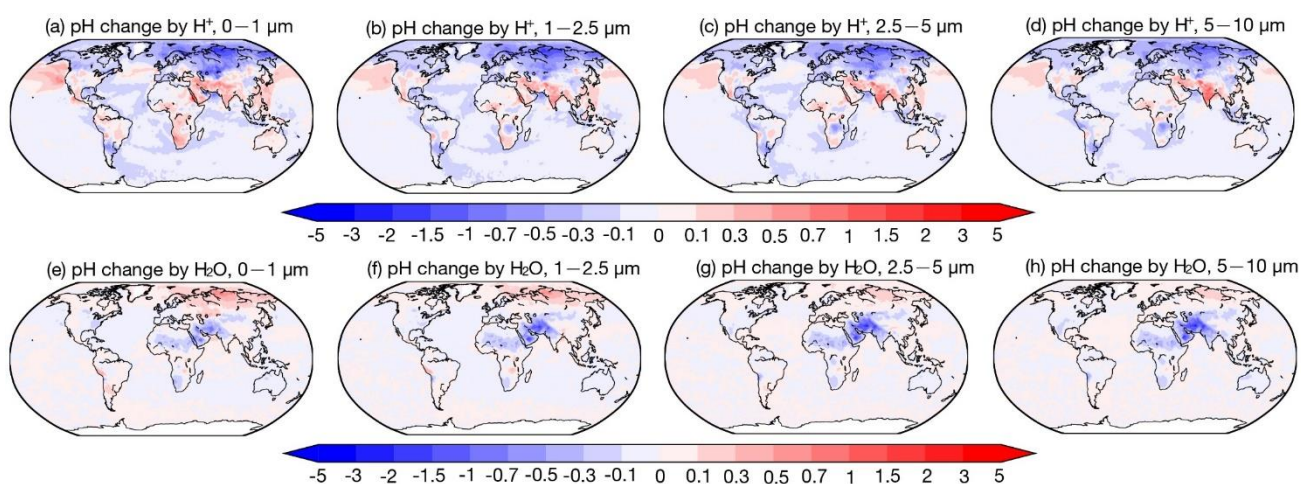

**Figure S15.** Global distribution of pH value changes derived by  $\text{H}^+$  concentration change from CEDS case in the size range of 0 – 1  $\mu\text{m}$  (a), 1 – 2.5  $\mu\text{m}$  (b), 2.5 – 5  $\mu\text{m}$  (c), and 5 – 10  $\mu\text{m}$  (d); pH value changes derived by  $\text{H}_2\text{O}$  concentration change in the size range of 0 – 1  $\mu\text{m}$  (e), 1 – 2.5  $\mu\text{m}$  (f), 2.5 – 5  $\mu\text{m}$  (g), and 5 – 10  $\mu\text{m}$  (h), averaged from 2010 to 2012.

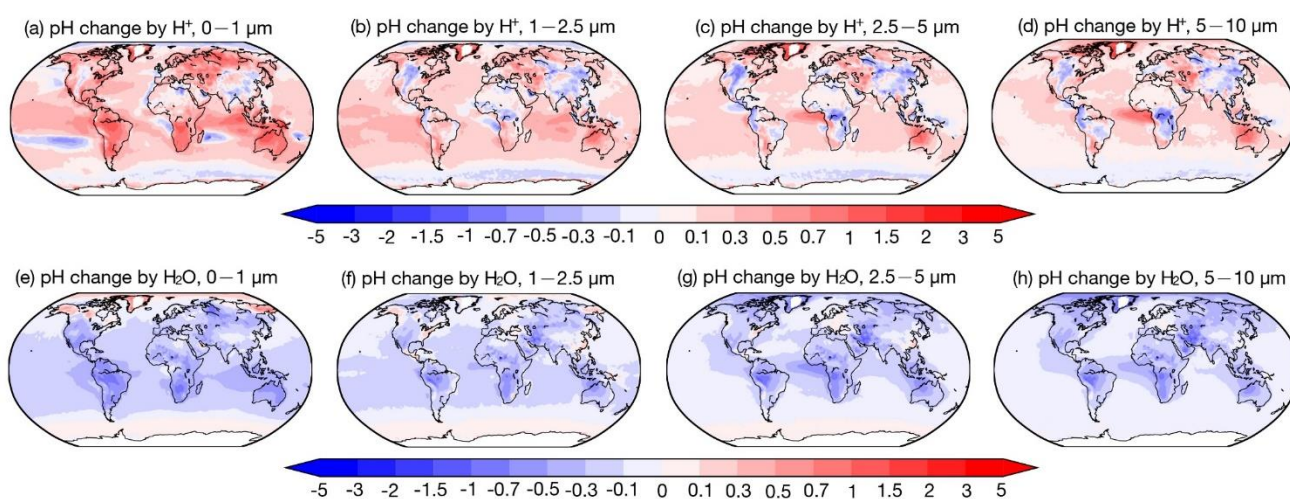

**Figure S16.** Global distribution of pH value changes derived by  $\text{H}^+$  concentration change from Top-Dep case in the size range of 0 – 1  $\mu\text{m}$  (a), 1 – 2.5  $\mu\text{m}$  (b), 2.5 – 5  $\mu\text{m}$  (c), and 5 – 10  $\mu\text{m}$  (d); pH value changes derived by  $\text{H}_2\text{O}$  concentration change in the size range of 0 – 1  $\mu\text{m}$  (e), 1 – 2.5  $\mu\text{m}$  (f), 2.5 – 5  $\mu\text{m}$  (g), and 5 – 10  $\mu\text{m}$  (h), averaged from 2010 to 2012.
